# Supplementary material for: Evaluating the impact of COVID-19 outbreak on hepatitis B and forecasting the epidemiological trend in mainland China: a causal analysis
Source: Springer Nature journal article supplement (doi:10.1186/s12889-023-17587-3), 2024-01-02
Supplement: MOESM5 [file 26583180]

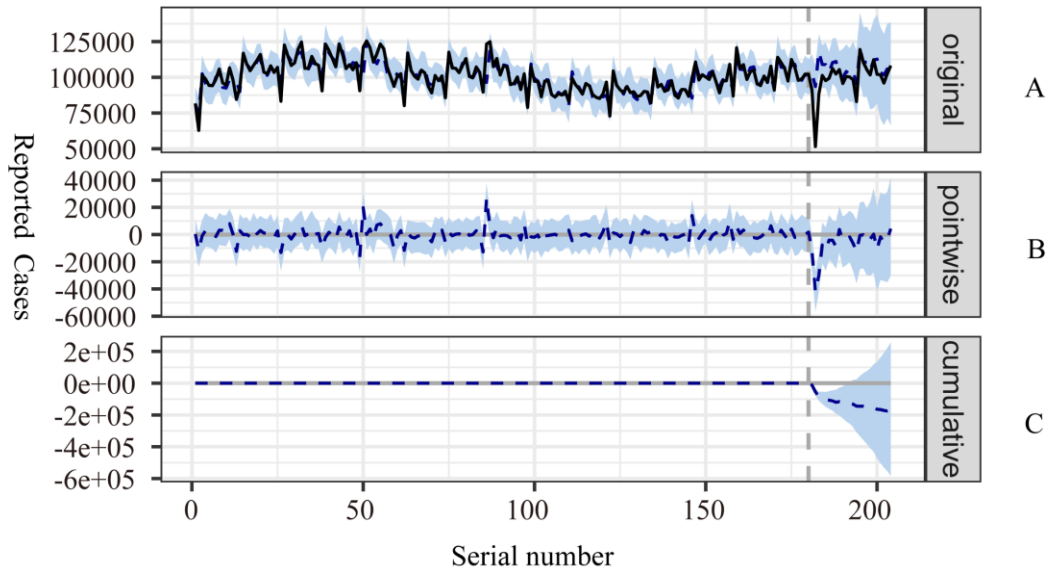

**Fig. S1** Time series plot of causal effects of the COVID-19 on hepatitis B notifications in 2020-2021. The panel A, B and C shows the hepatitis B case notifications and counterfactual forecasted results for the post-outbreak period, pointwise causal effect and cumulative effect respectively.
